# Supplementary material
Source: PubMed Central journal article supplement (PMC4144807)
Supplement: NIHMS562719-supplement-1.pdf [file NIHMS562719-supplement-1.pdf]

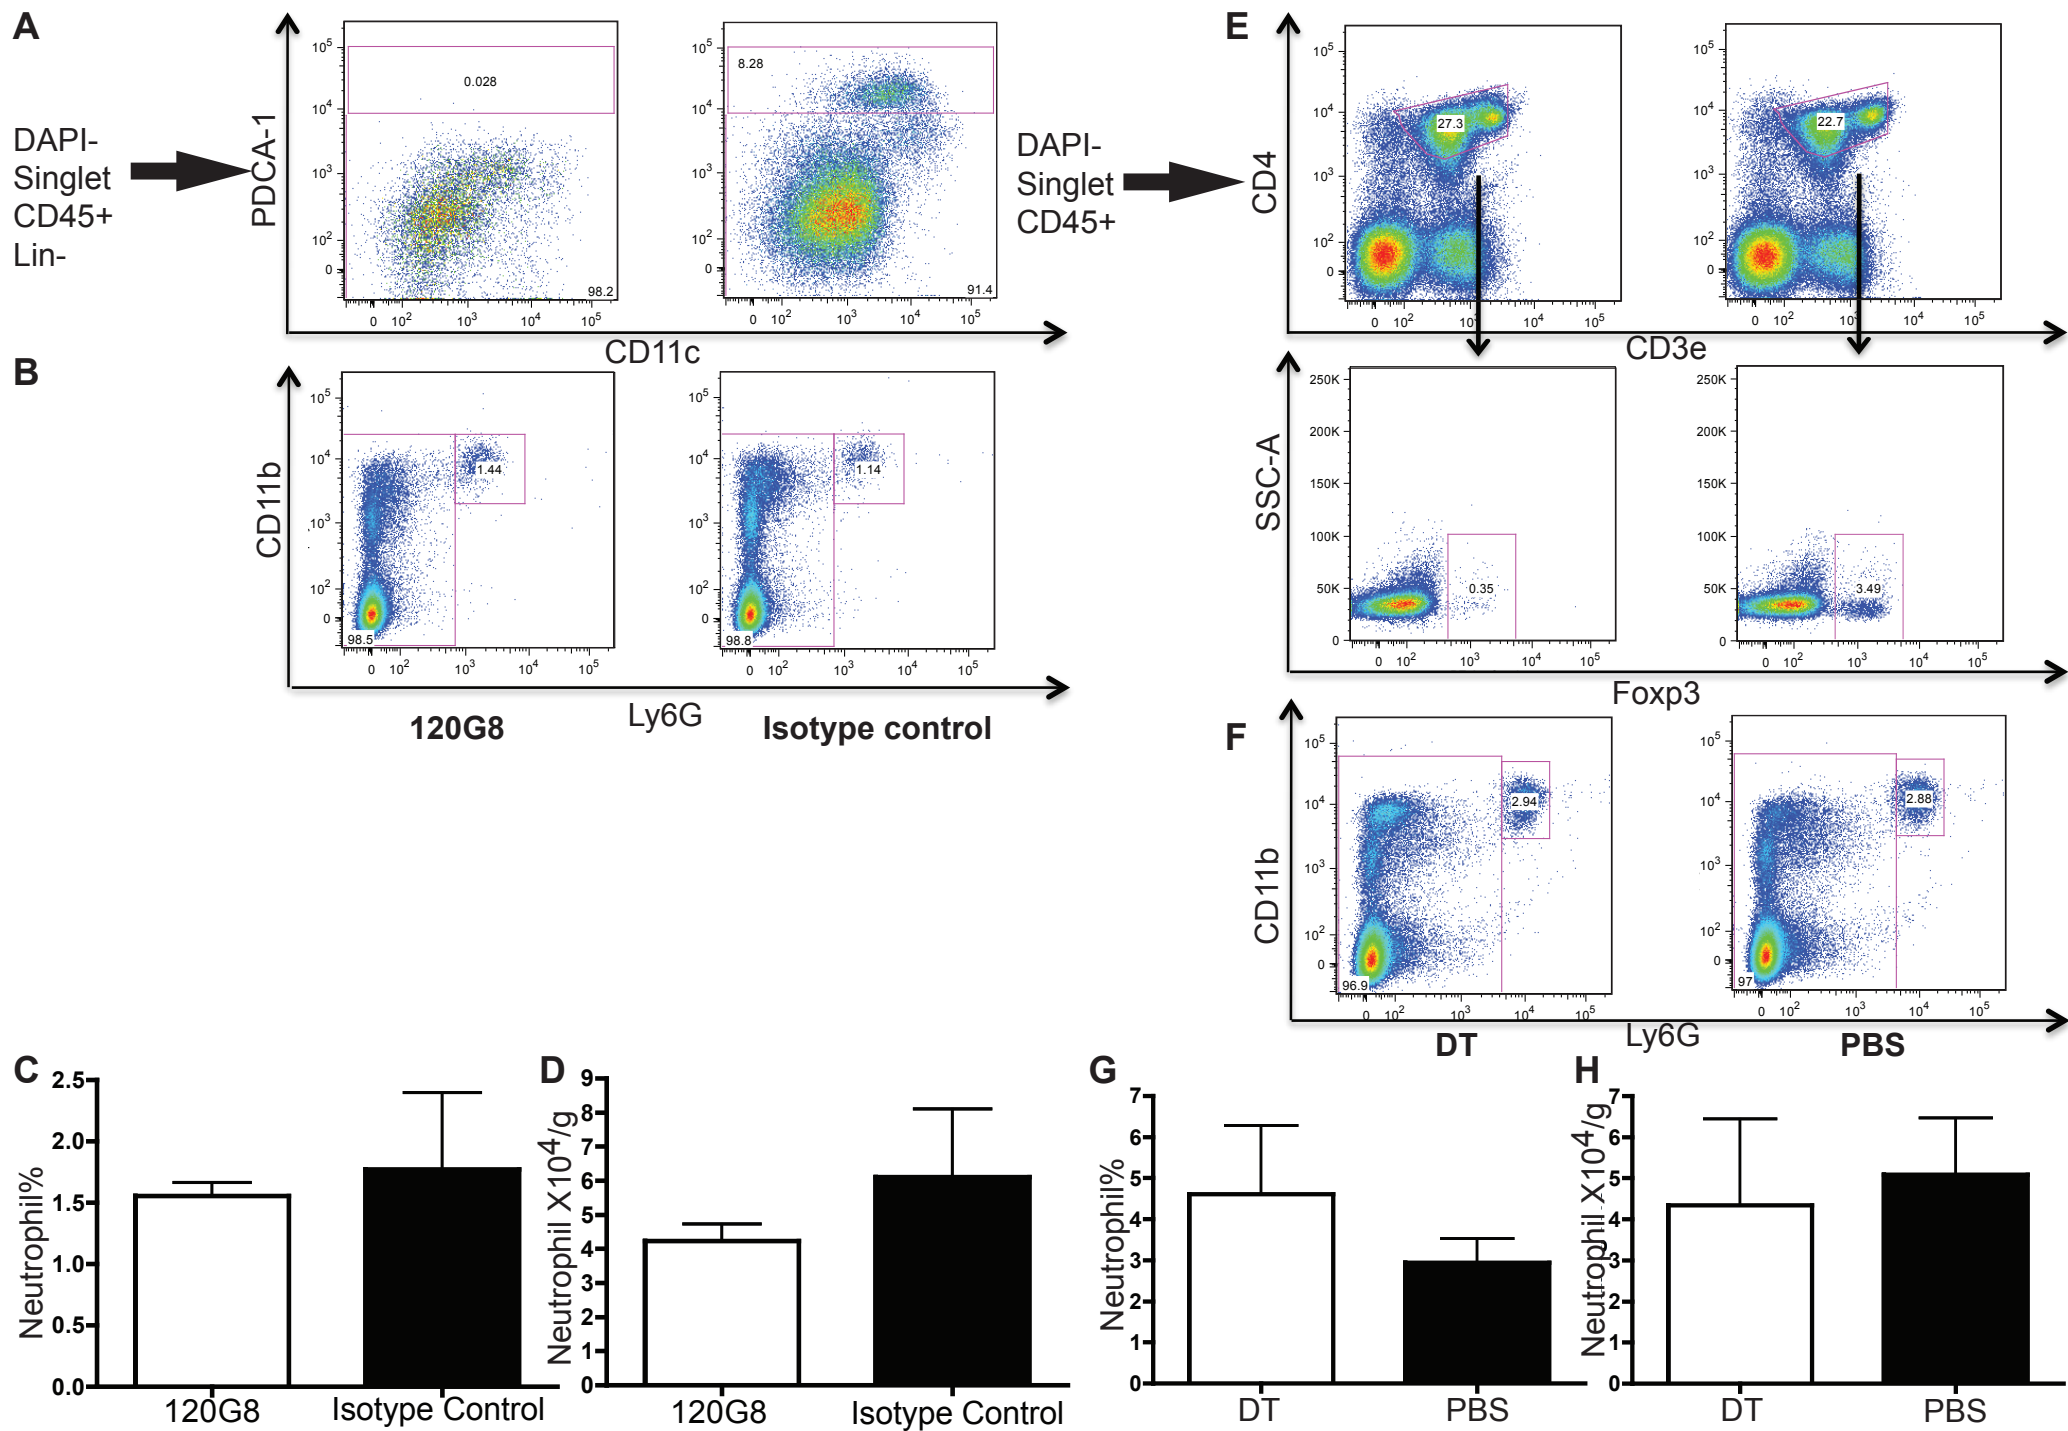

### Supplemental Figure 1.

**pDC or Treg depletion do not increase neutrophil number.** FACS plots of liver pDC (**A**) and Treg (**E**) show efficient depletion by 120G8 and DT respectively but with similar number of neutrophil (**B** and **F**) compared with isotype control. Neutrophil percentages (**C** and **G**) and absolute number (**D** and **H**) are graphed. Results are expressed as mean value +/- standard deviation (n=4 mice).

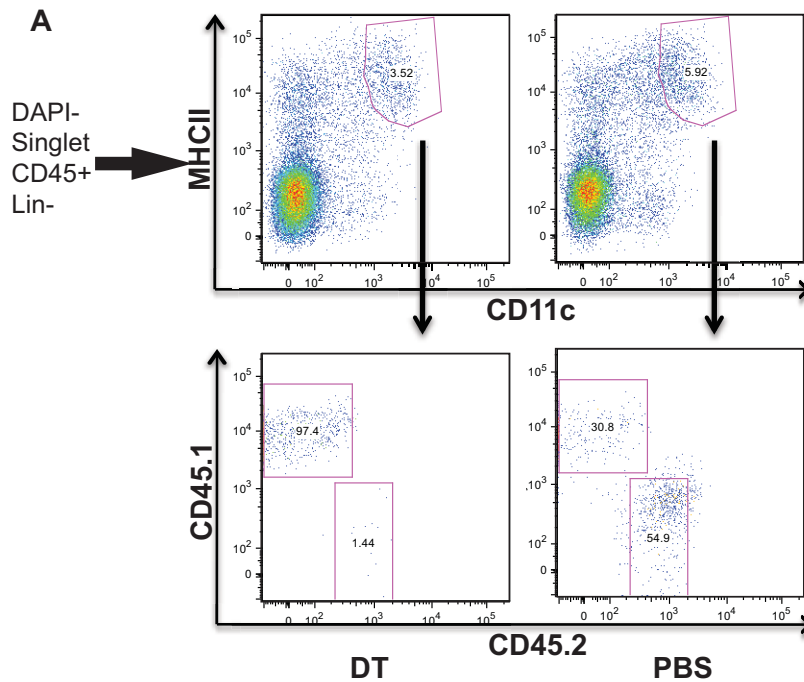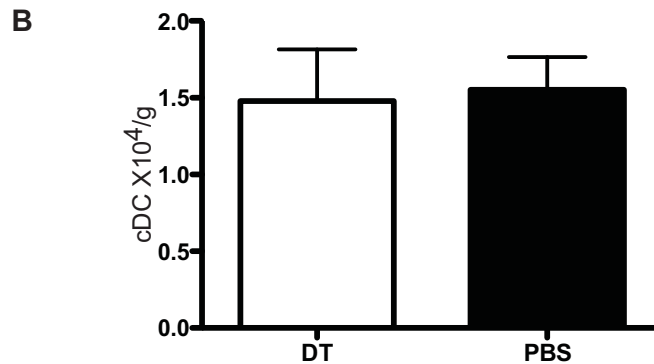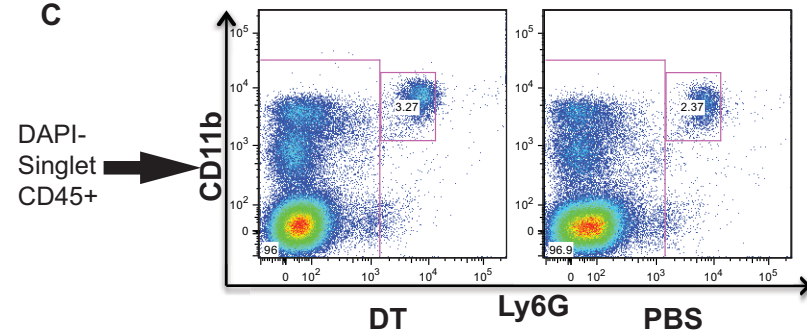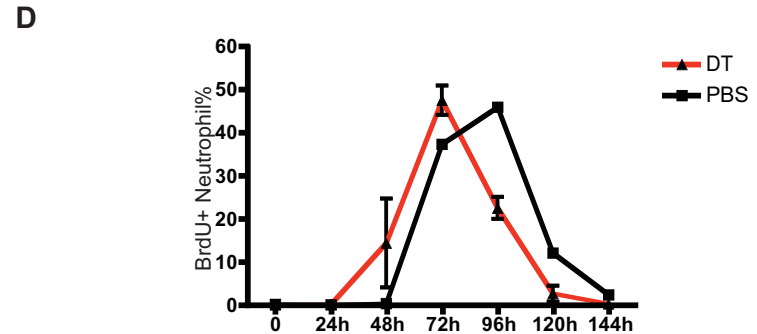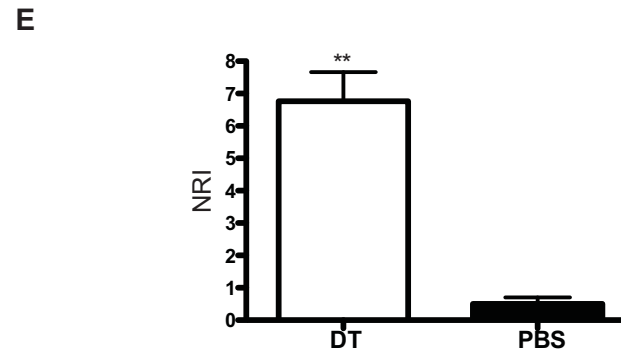

## Supplemental Figure 2

**The presence of WT cDC rescues increased neutrophil phenotype. (A)** DT injection depletes the cDC derived from CD11c-DTR bone marrow (CD45.2) without affecting the overall cDC number **(B)**. **(C)** In spite of CD45.2+DC depletion, the presence of CD45.1+WT cDC maintains a normal number of the neutrophils similar to control. Results are expressed as mean value +/- standard deviation (n=3 mice). The experiments were repeated twice with similar results. **(D-E) Acute cDC depletion results in earlier appearance of BrdU+ neutrophil in periphery blood and increased hepatic neutrophils recruitment. (D)** BrdU labeling followed by DT induced cDC depletion results in earlier appearance of BrdU labeled neutrophils in the blood. **(E)** Calculated hepatic neutrophils recruitment index is significantly elevated in after cDC depletion (N=4 mice).

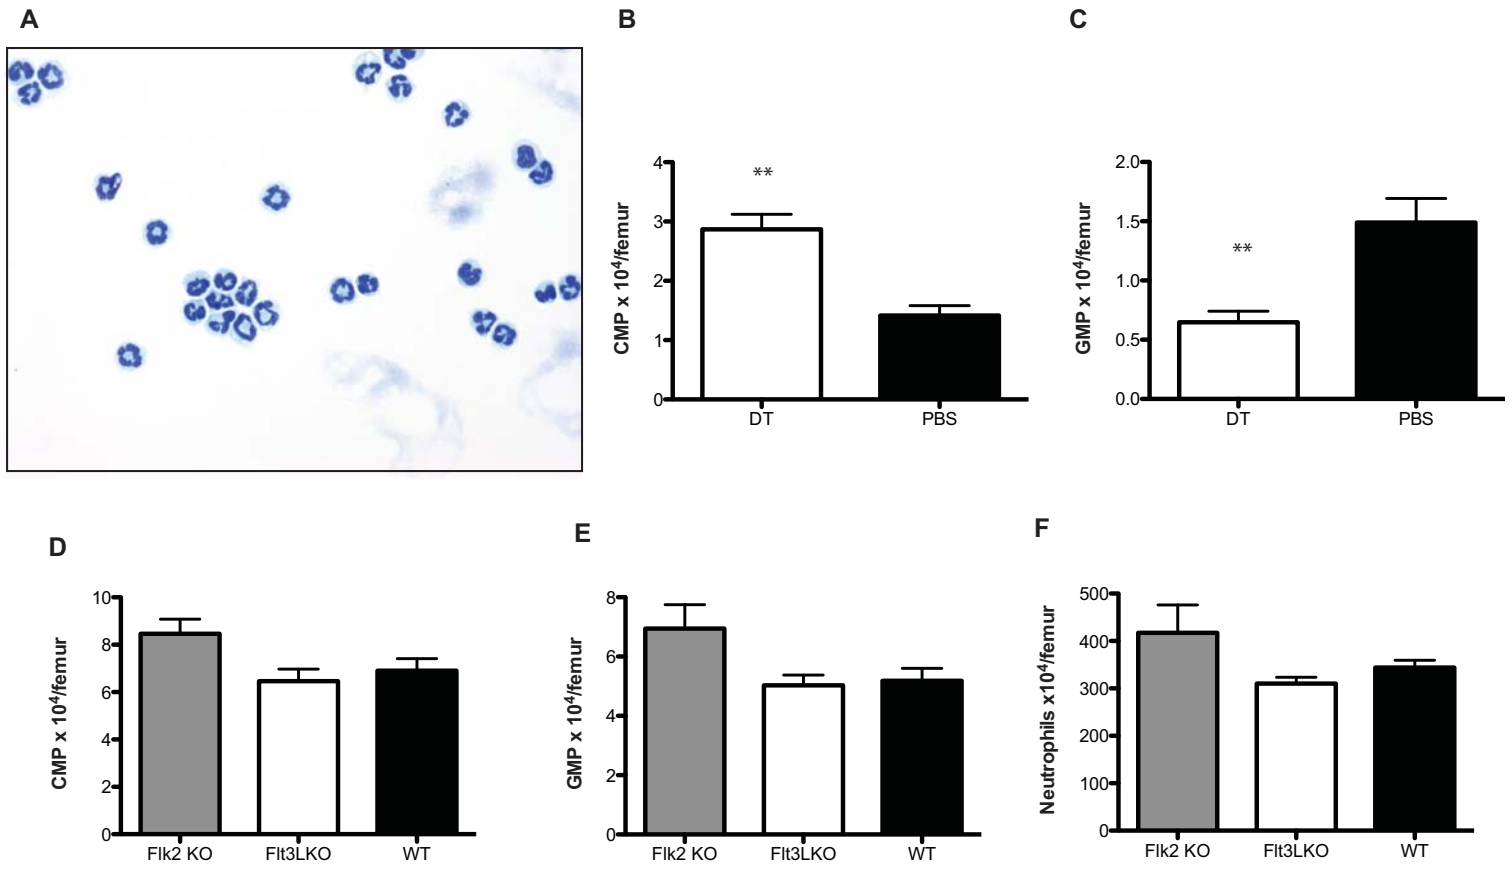

### Supplemental Figure 3

**cDC deficiency does not have a significant impact in neutrophil production.** (A) Majority of the hepatic neutrophils are mature segmented neutrophil as shown by Hema-3 staining in sorted Ly6G+CD11b+ cell. (B-E) cDC deficiency does not affect myeloid progenitors in the bone marrow as shown by the absolute number of CMP and GMP in cDC depleted mice (B-C) or cDC deficient mice (D-E). CMP is gated as CD45+lin-c-kit+Sca-1-CD16/32<sup>int</sup>CD34<sup>int</sup>. GMP is gated as CD45+lin-c-Kit+Sca-1-CD16/32+CD34+. (F) No difference in bone marrow neutrophil numbers of cDC deficient mice.

**A**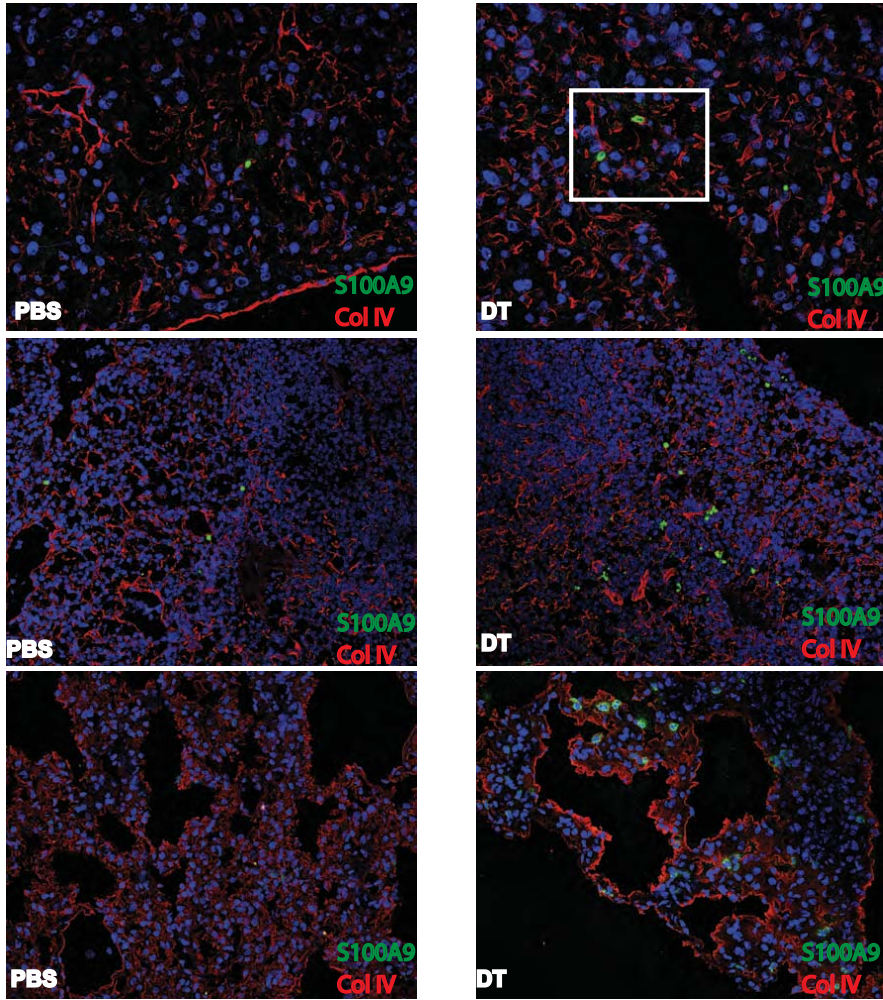**B**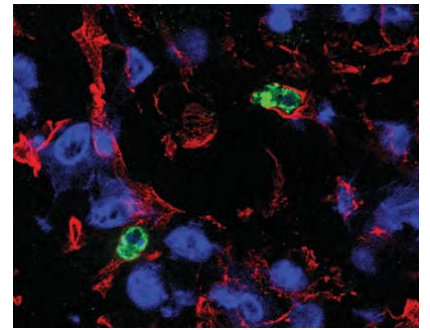**C**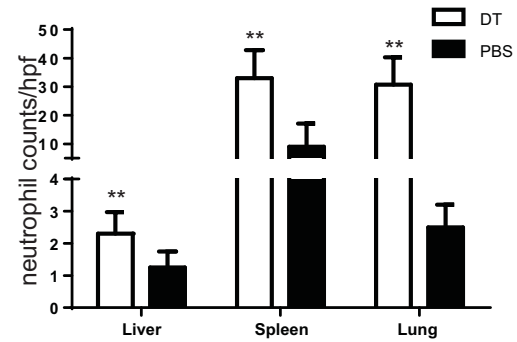

### Supplemental Figure 4

**cDC depletion results in systemic neutrophil increase.** Neutrophils in the sinusoid of the liver (top), spleen (middle) and lung (bottom) are indicated by S100A9 and collagen IV immunofluorescence staining (**A**). Zoomed images are shown in (**B**). S100A9 positive neutrophil number is quantified per high power field (**C**). Images are taken at 400X.
